# Supplementary material for: Energy awareness prediction model based on multi-agent decision-making modeling in green supply chain marketing strategy
Source: PeerJ journal article supplement (doi:10.7717/peerj-cs.3440), 2026-01-15
Supplement: readme.docx [file readme.docx]

**Energy Awareness Prediction Model**

**Description**

This repository contains the code and supporting documentation for the "Energy Awareness Prediction Model based on Multi-Agent Decision-Making Modeling in Green Supply Chain Marketing Strategy." The project develops a BiLSTM-based prediction framework integrated with evidence theory and K-means clustering to forecast energy awareness trends among supply chain entities under green marketing strategies. It aims to support sustainable development by enhancing decision-making in the context of the "dual carbon" strategy.

**Dataset Information**

The dataset comprises multi-source historical data collected from green supply chain entities over 2023-2024, including energy consumption, marketing intervention responses, and behavioral patterns. It includes approximately 2 years of time-series data, segmented into 30-day intervals, with features normalized to a [0, 1] scale and categorical variables encoded using one-hot encoding. The dataset is split into 80% training and 20% testing sets for model evaluation.

**Code Information**

The code implements a BiLSTM model enhanced with evidence theory for data fusion and K-means clustering for behavior pattern identification. It includes Python scripts for data preprocessing, model training (50 epochs, learning rate 0.001, batch size 32), and evaluation using RMSE and MAE metrics. The repository includes Jupyter notebooks and Python files, with comments detailing each step from data loading to prediction output.

**Usage Instructions**

1. Clone the repository: git clone https://github.com/yourusername/Energy_Awareness_Prediction_Model.git.
2. Navigate to the directory: cd Energy_Awareness_Prediction_Model.
3. Install dependencies (see Requirements below).
4. Load the dataset from the data/ folder or replace with your own preprocessed CSV file.
5. Run the preprocessing script: python preprocess_data.py.
6. Train the model: python train_model.py.
7. Evaluate results: python evaluate_model.py (outputs RMSE and MAE).
8. Predictions can be generated using predict_trends.py with new data input.

**Requirements**

- Python 3.10
- TensorFlow 2.15
- scikit-learn
- NumPy
- pandas
- matplotlib (for visualization)
- Install via: pip install -r requirements.txt (create requirements.txt with listed packages).

**Methodology**

The methodology involves collecting multi-source data, cleaning it with median imputation and normalization, and encoding categorical variables. Evidence theory fuses data to reduce uncertainty, followed by K-means clustering (k=5 via elbow method) to identify energy behavior patterns. The BiLSTM model is then trained on clustered data, with hyperparameters optimized using grid search, to predict energy awareness trends over time.
